# Supplementary material for: Real-Time PCR Detection Patterns of Porcine Circovirus Type 2 (PCV2) in Polish Farms with Different Statuses of Vaccination against PCV2
Source: MDPI journal article supplement (doi:10.3390/v11121135), 2019-12-08
Supplement: s1 [file s1]

**Table S4.** Comparison of porcine circovirus type 2 (PCV2) vaccination status: farms non-vaccinated against PCV2 (NON-VAC) and vaccinated farms (VAC) and vaccination protocols: vaccination of piglets (VAC1) or vaccination of sows and their progeny (VAC2). Viral loads based on real-time PCR were expressed as log<sub>10</sub> viral copies number per milliliter of a pool or oral fluid (copies/mL). Statistical comparisons of percentages (Fisher's exact test) and viral loads (Mann-Whitney test) of total PCV2-positive samples for farms with different vaccination protocol were performed. Statistical significant differences (p<0.05) are marked with superscripts (a, b, c and A, B, C). The table exclude farms with clinical sings resembling PCV2-associated diseases (PCVD) and high detection rate of PCV2 in serum, feces and oral fluids.

|                     |                 | % of PCV2-positive samples and PCV2 log <sub>10</sub> viral load<br>(minimum – maximum; median [copies/mL]) |                                |                             |                             |
|---------------------|-----------------|-------------------------------------------------------------------------------------------------------------|--------------------------------|-----------------------------|-----------------------------|
| Diagnostic material |                 | NON-VAC                                                                                                     | VAC                            | VAC1                        | VAC2                        |
| serum               | %               | 63.5%<br>(33/52) <sup>a</sup>                                                                               | 5.6%<br>(20/251) <sup>a</sup>  | 11.1%<br>(12/108)           | 5.6%<br>(8/143)             |
|                     | PCV2 viral load | 3.8-8.5<br>6.2 <sup>A</sup>                                                                                 | 3.8-6.5<br>4.8 <sup>A</sup>    | 4.2-6.0<br>5.0              | 3.8-6.5<br>4.5              |
|                     |                 |                                                                                                             |                                |                             |                             |
| feces               | %               | 84.6%<br>(44/52) <sup>b</sup>                                                                               | 21.4%<br>(52/243) <sup>b</sup> | 18.5%<br>(20/108)           | 23.7%<br>(32/135)           |
|                     | PCV2 viral load | 4.1-10.0<br>6.2 <sup>B</sup>                                                                                | 3.7-7.7<br>4.5 <sup>B</sup>    | 3.8-7.7<br>4.9 <sup>D</sup> | 3.7-7.6<br>4.3 <sup>D</sup> |
|                     |                 |                                                                                                             |                                |                             |                             |
| oral fluid          | %               | 64.5%<br>(20/31) <sup>c</sup>                                                                               | 37.4%<br>(55/147) <sup>c</sup> | 35.5%<br>(22/62)            | 38.8%<br>(33/85)            |
|                     | PCV2 viral load | 4.3-8.7<br>7.2 <sup>C</sup>                                                                                 | 3.7-7.4<br>5.1 <sup>C</sup>    | 3.7-7.3<br>5.1              | 3.7-7.4<br>5.0              |
|                     |                 |                                                                                                             |                                |                             |                             |
